# Supplementary material
Source: PubMed Central journal article supplement (PMC5404564)
Supplement: AAC.00112-17_zac005176167s1.pdf [file AAC.00112-17_zac005176167s1.pdf]

**Table S1** Isolation of *Campylobacter* from chicken and swine samples collected in 2014

| Host    | Region <sup>a</sup> | No. samples | Positive sample (%) | No. <i>Campylobacter</i> isolates |                          |                        |
|---------|---------------------|-------------|---------------------|-----------------------------------|--------------------------|------------------------|
|         |                     |             |                     | No. isolates                      | No. <i>C. jejuni</i> (%) | No. <i>C. coli</i> (%) |
| Chicken | GD                  | 176         | 122 (69.3)          | 135                               | 16 (11.9)                | 119 (88.1)             |
|         | NX                  | 296         | 66 (22.3)           | 60                                | 37 (61.7)                | 23 (38.3)              |
|         | SH                  | 163         | 77 (47.2)           | 77                                | 25 (32.5)                | 52 (67.5)              |
|         | HN                  | 317         | 85 (26.8)           | 79                                | 75 (94.9)                | 4 (5.1)                |
|         | SD                  | 431         | 182 (42.2)          | 164                               | 1 (0.6)                  | 163 (99.4)             |
|         | NX                  | 228         | 32 (14.0)           | 27 <sup>c</sup>                   | 6 (22.2)                 | 20 (74.1)              |
|         | SH                  | 84          | 43 (51.2)           | 56 <sup>c</sup>                   | 0                        | 52 (92.9)              |
|         | HN                  | 157         | 21 (13.4)           | 14                                | 0                        | 14 (100)               |

<sup>a</sup>Abbreviations: GD, Guangdong province; NX, Ningxia province; SH, Shanghai; HN, Henan province; and SD, Shandong province.

<sup>b</sup>There were 5 isolates belonging to other *Campylobacter* species.

**Table S2** PCR primers used in this study.

| Primers     | Sequence (5'-3')                      | Annealing temperature (°C) | Product size (bp) | Reference  |
|-------------|---------------------------------------|----------------------------|-------------------|------------|
| aph2-Ig-F   | TTGAGAATGCCATGGAACGGATCGG             | 60                         | 864               | (1)        |
| aph2-Ig-R   | GGGTCTATGGCTAGAAGTTCACGG              |                            |                   |            |
| aacA-aphD-F | ACAGAGCCTTGGGAAGATGAAG                | 54                         | 1106              | (1)        |
| aacA-aphD-R | TGTTCCCTATTCTTCTTCACTATC              |                            |                   |            |
| aacA4-F     | ATCTCATATCGTCGAGTGGAC                 | 50                         | 440               | (1)        |
| aacA4-R     | CGTGTTTGAACCATGTAC                    |                            |                   |            |
| P1          | CTAGCCATCATTTTTAACTTTTTTTTAC          | 58.5                       | 2158              | This study |
| P2          | ATAGCTTGACCTGATTATCAAGGCAAAG          |                            |                   |            |
| P3          | GATAATCAGGTACAAGCTATAAGGTTATTGTCC     | 59.8                       | 1024              | This study |
| P4          | TACTTTTTCTCATATGATAACGGAATTCGGTC      |                            |                   |            |
| P5          | CCGTTATCATATGAGAAAAAGTATGATTAGTTTTTTG | 58.4                       | 822               | This study |
| P6          | GTATAATTTATCTAATAATTCATCATCTAAATAATC  |                            |                   |            |
| cj0299-F    | GTGCCGCTTGATTATACTC                   | 55                         | Unknown           | This study |
| panB-R      | GGCATATCAGCAAGTACGAAAGAC              |                            |                   |            |
| If-F        | TTGGTGAGGGTTATGACAGC                  | 55                         | 831               | This study |
| If-R        | CACTTCCTTAATTTTTTCATCTTTGC            |                            |                   |            |

1. **Zhao S, Mukherjee S, Chen Y, Li C, Young S, Warren M, Abbott J, Friedman S, Kabera C, Karlsson M, McDermott PF.** 2015. Novel gentamicin resistance genes in *Campylobacter* isolated from humans and retail meats in the USA. *J Antimicrob Chemother* **70**:1314-1321.
